# Supplementary material for: Detection of RAGE expression and its application to diabetic wound age estimation
Source: Springer Nature journal article supplement (doi:10.1007/s00414-016-1529-7), 2017-01-11
Supplement: MOESM1 [file 11991862]

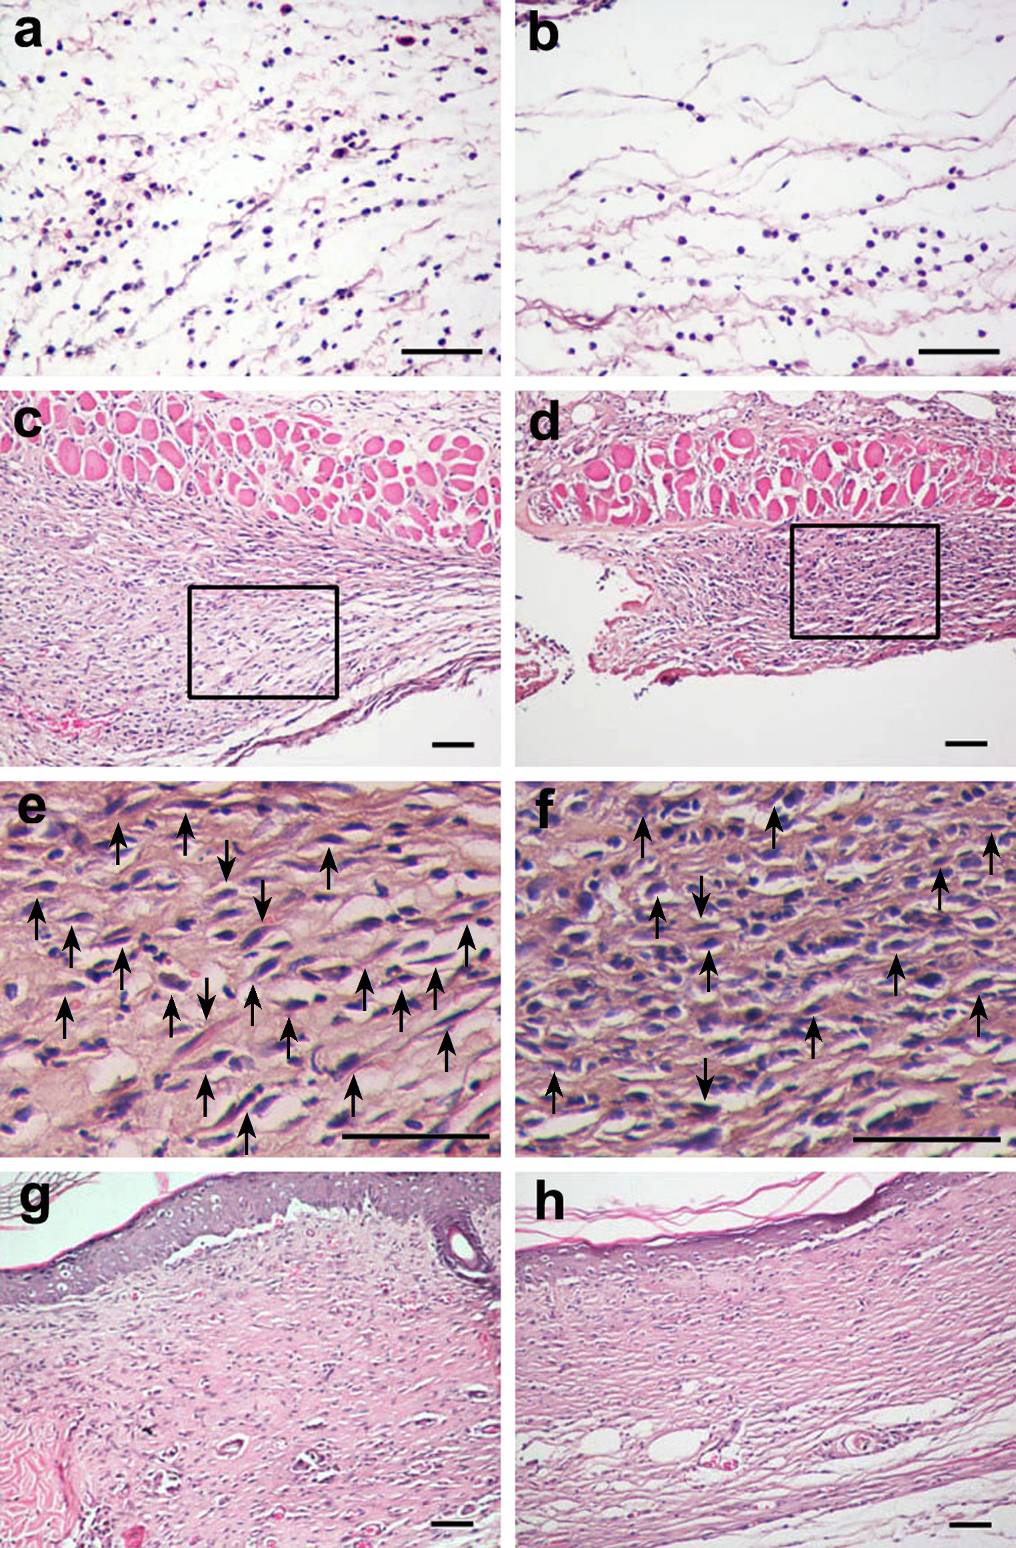


**Fig. 1** H-E staining in control (**a, c, e, g**) and diabetic (**b, d, f, h**) wound samples. Areas indicated by boxes in **c** and **d** are depicted at higher magnification in **e** and **f**, respectively. Control wound samples presented a number of inflammatory cells at 12 h post-injury (**a**), abundant granulation tissue and FBCs (*arrows*) at 7 days after injury (**c, e**), and well-formed connective tissue at 14 days post-wounding (**g**). Compared with control wounds, diabetic wounds exhibited insufficient infiltration of inflammatory cells at 12 h post-injury (**b**), excessive infiltration of inflammatory cells and insufficient density of FBCs (*arrows*) at 7 days after injury (**d, f**), and thin connective tissue at 14 days post-wounding (**h**). Representative results are shown here. *scale bar*, 50 μm
